# Supplementary material
Source: PubMed Central journal article supplement (PMC3906209)
Supplement: NIHMS521018-supplement-Supp_Data.pdf [file NIHMS521018-supplement-Supp_Data.pdf]

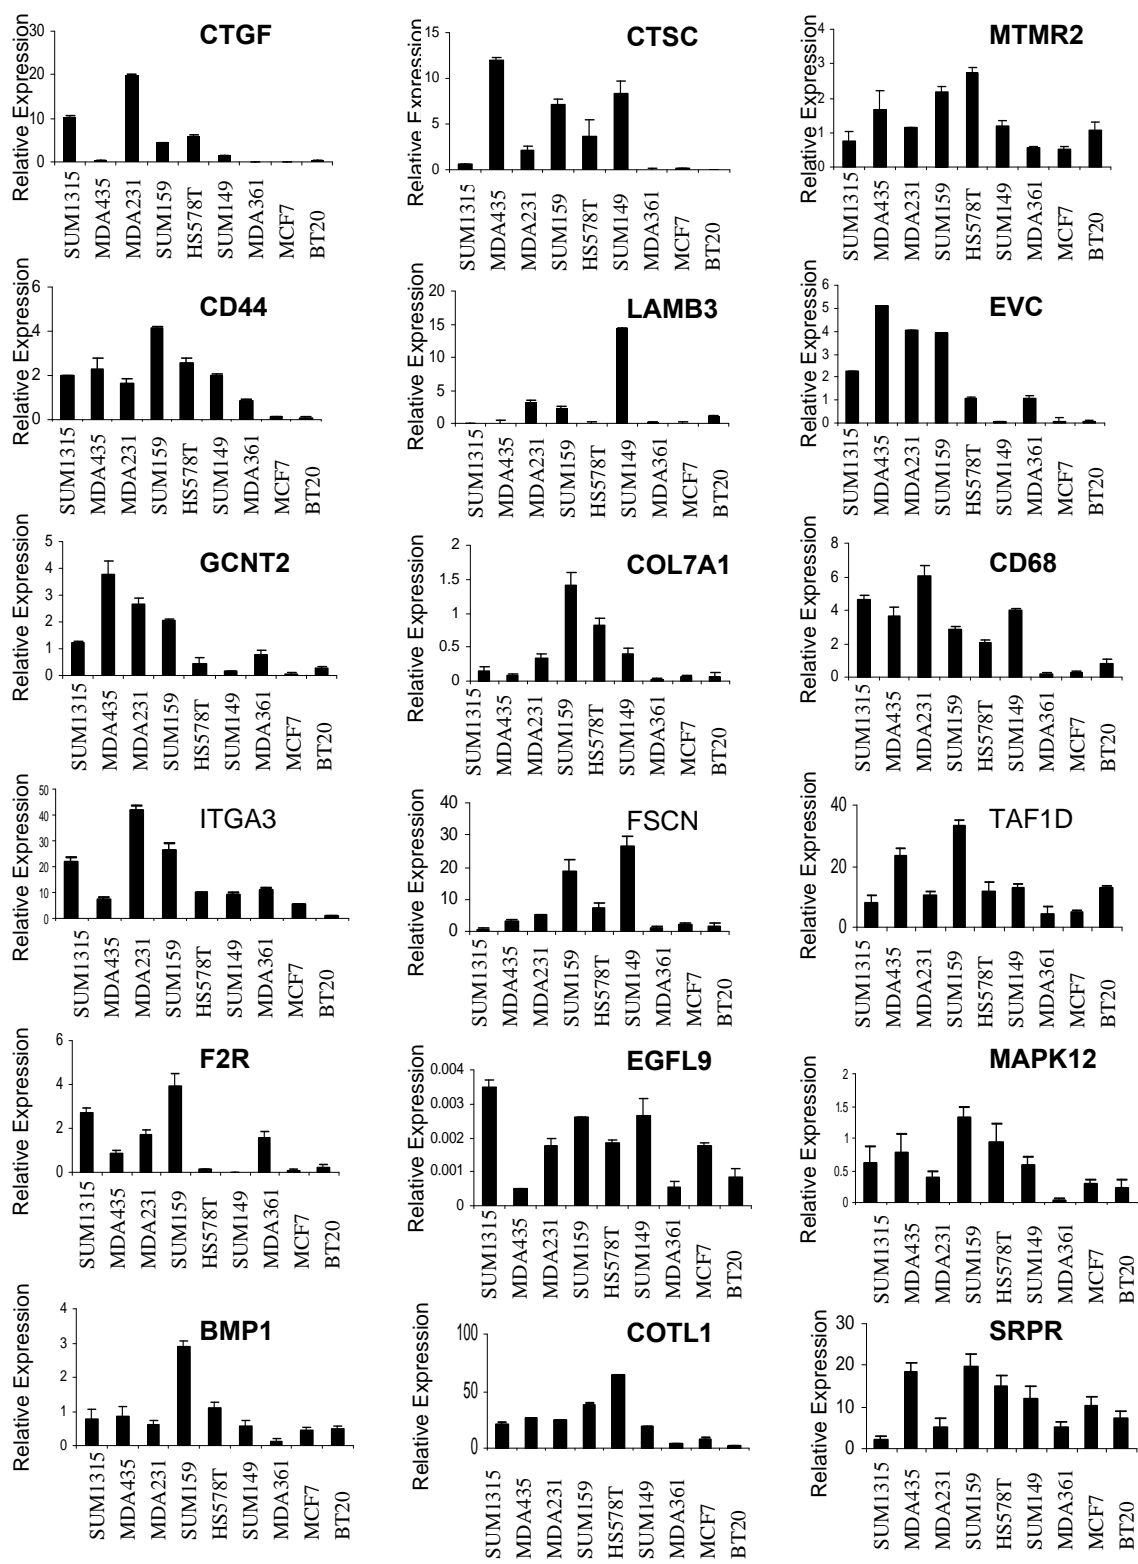

Supplementary figure 1. Zhang et al.

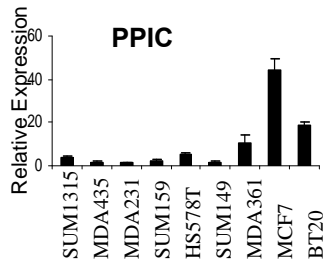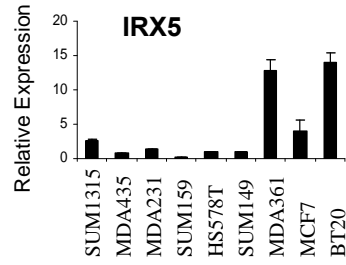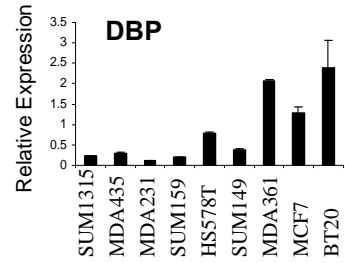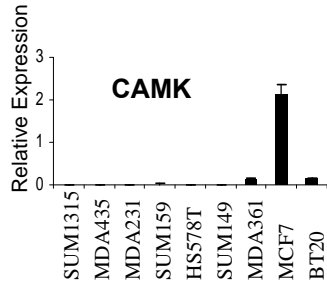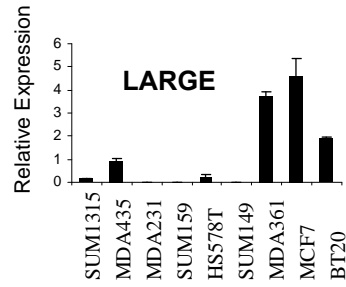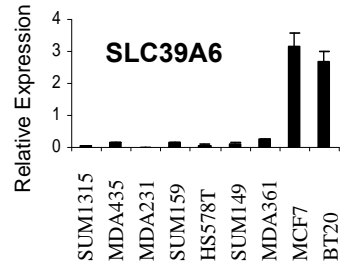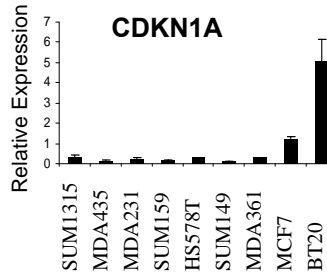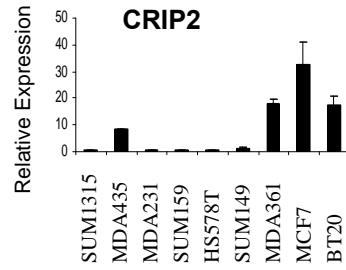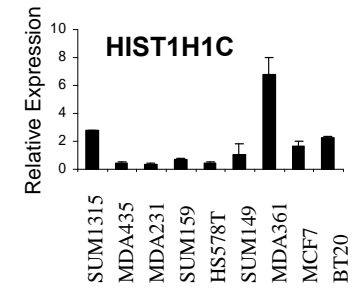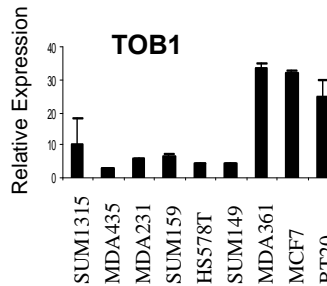

Supplementary figure 2. Zhang et al.

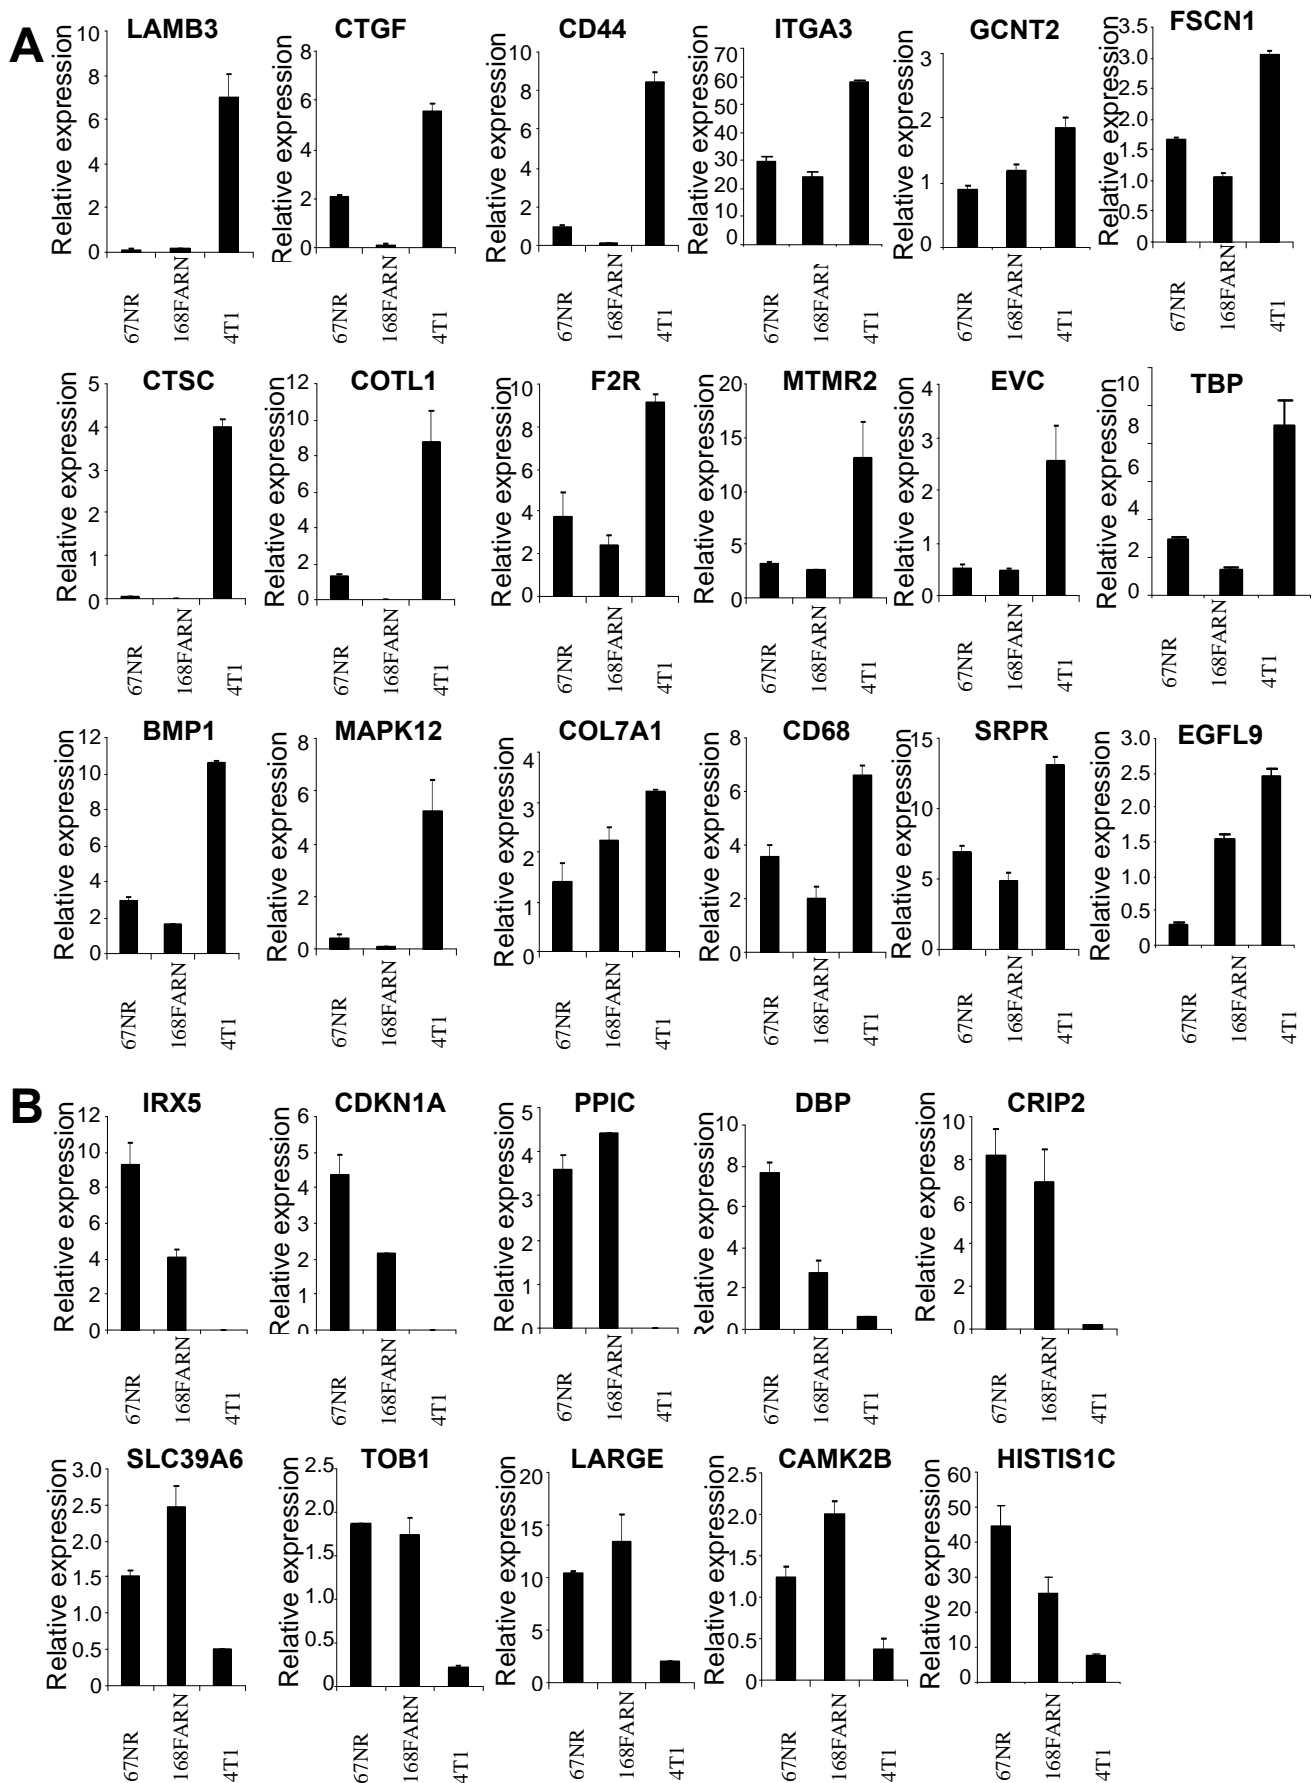

Supplementary figure 3. Zhang et al.

**A**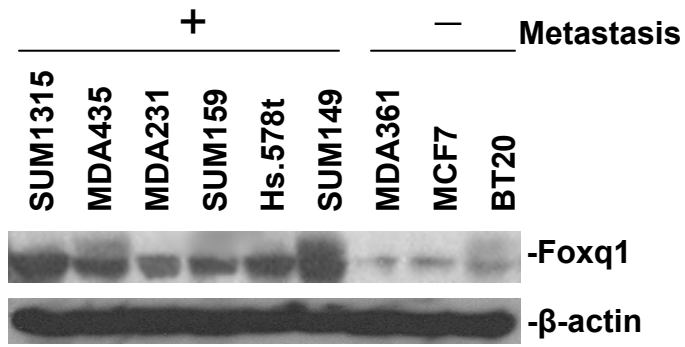**B**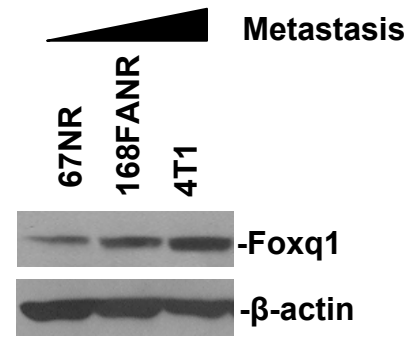**C**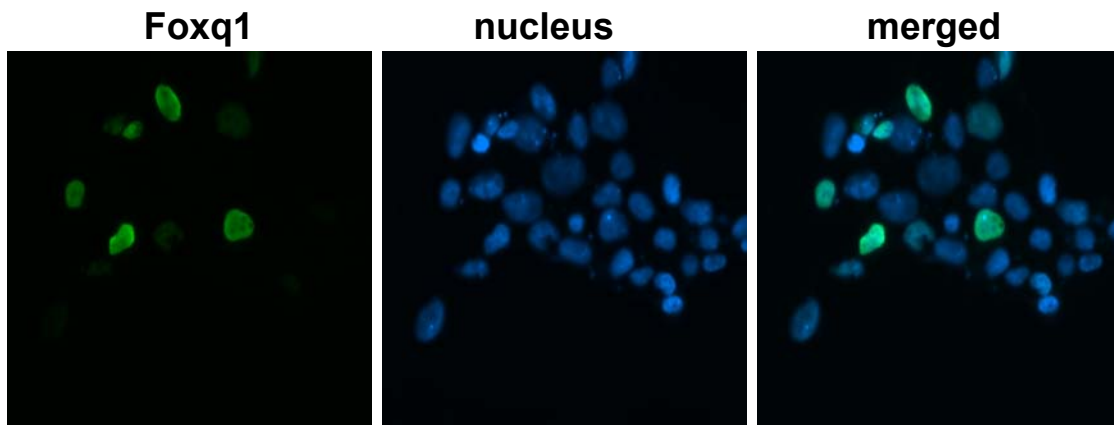

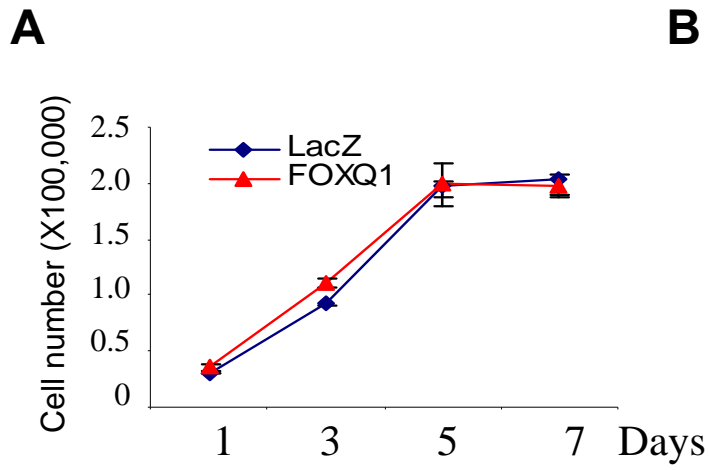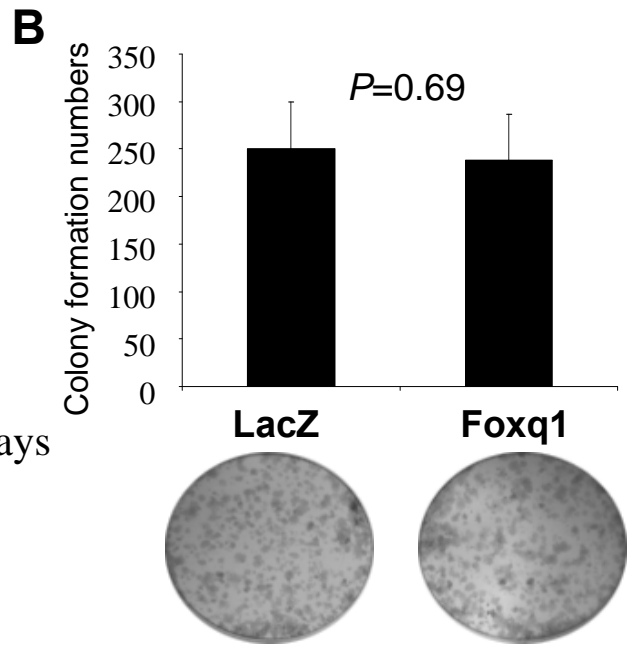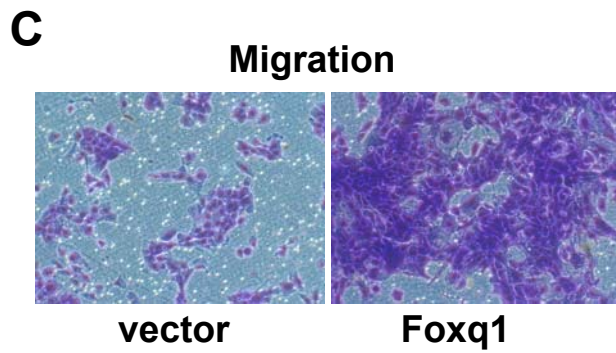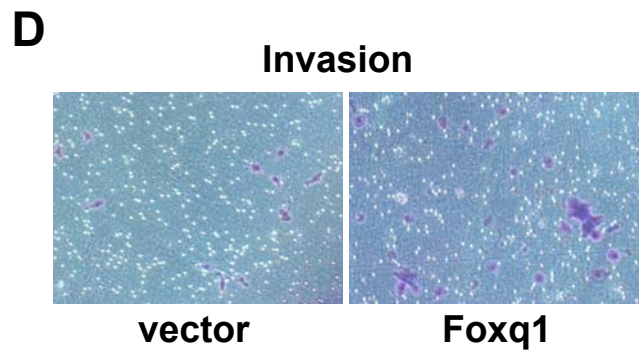

Supplementary figure 5. Zhang et al.

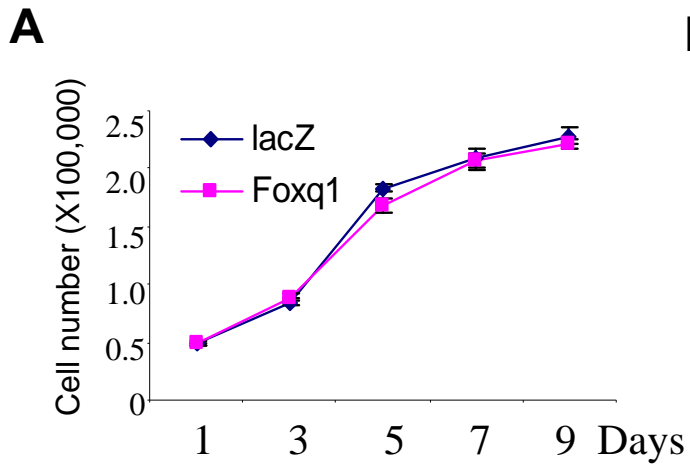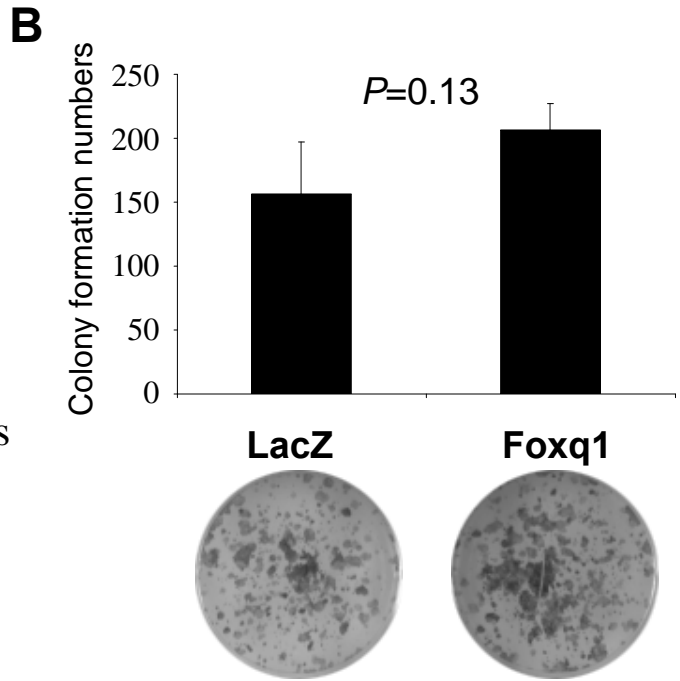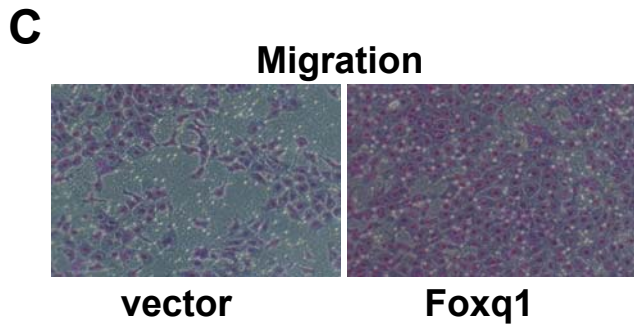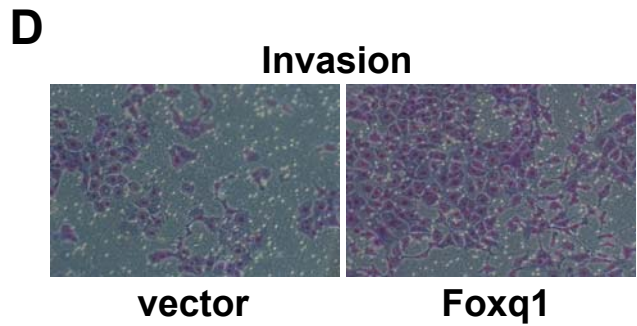

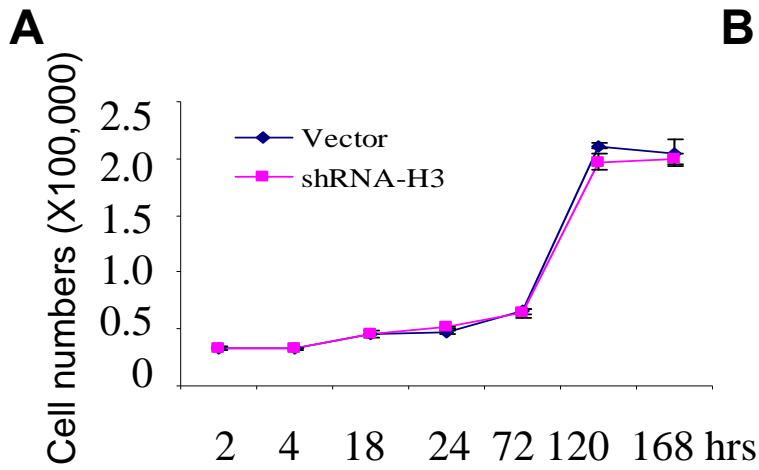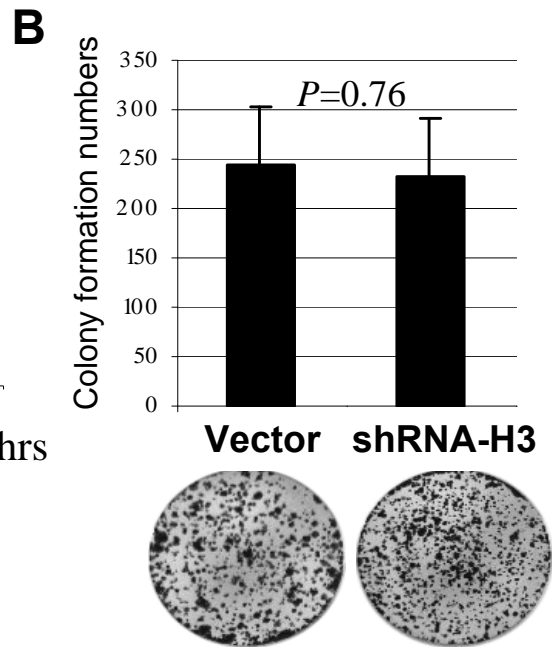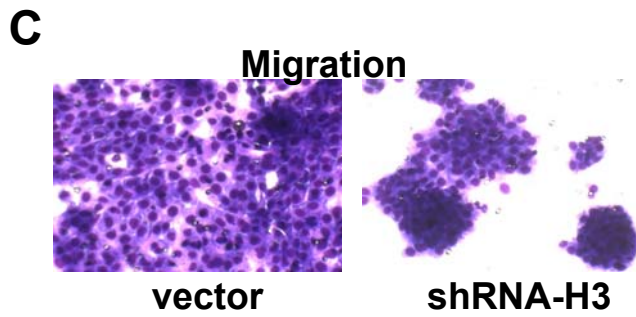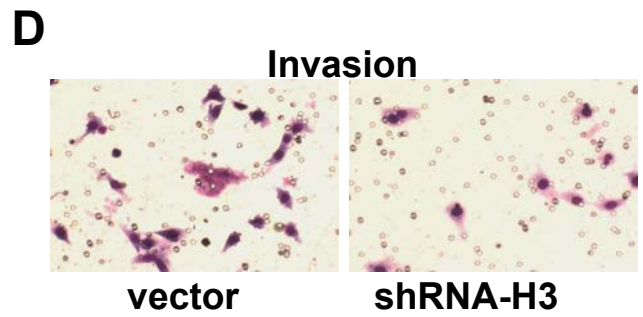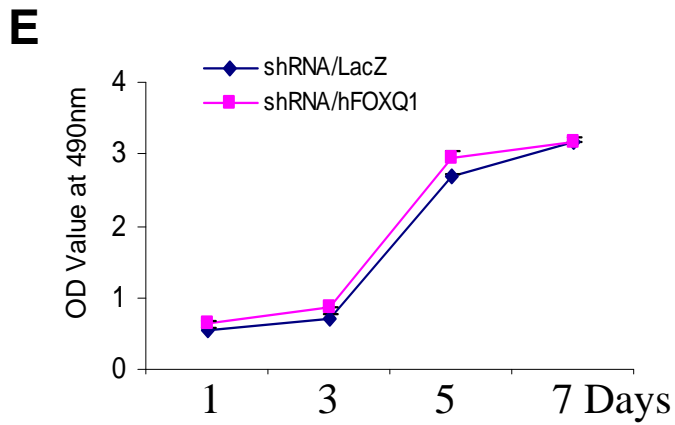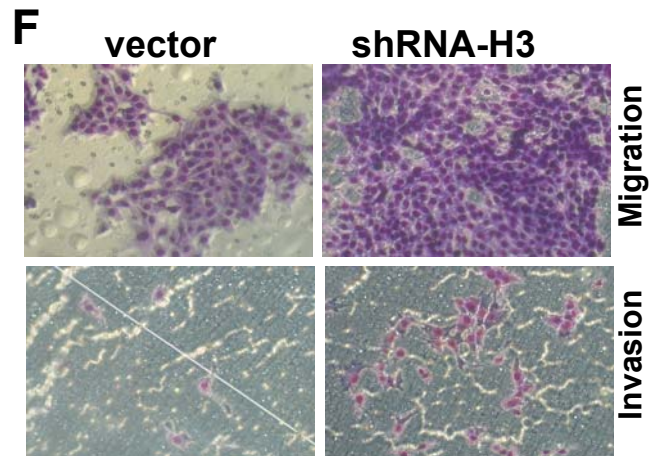

Supplementary figure 7. Zhang et al.

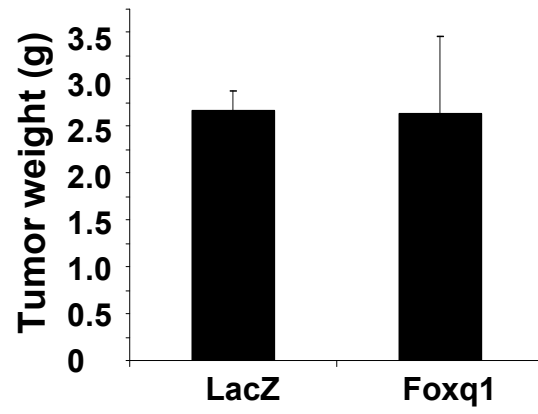

Supplementary figure 8. Zhang et al.



**A**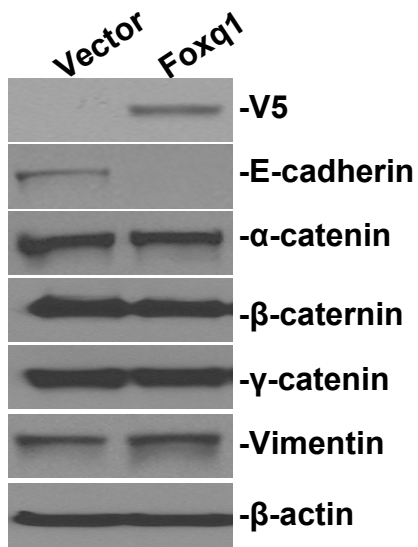**B**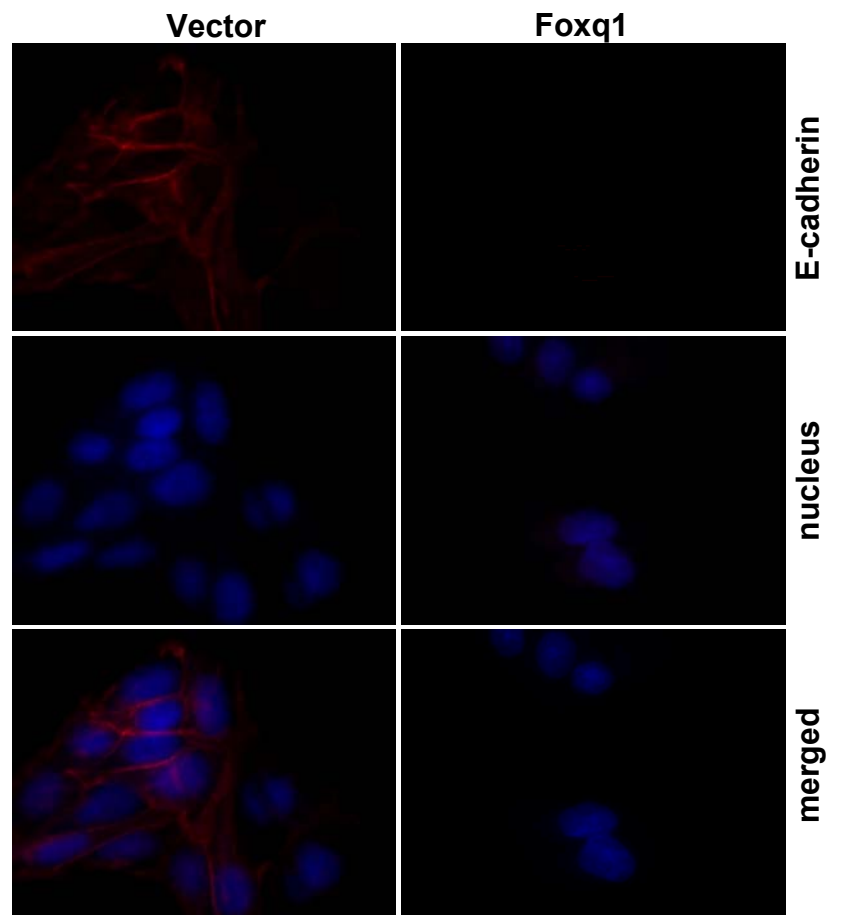

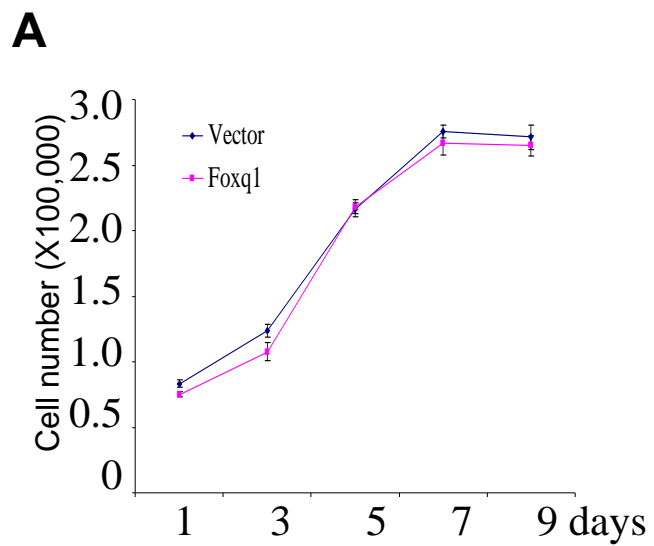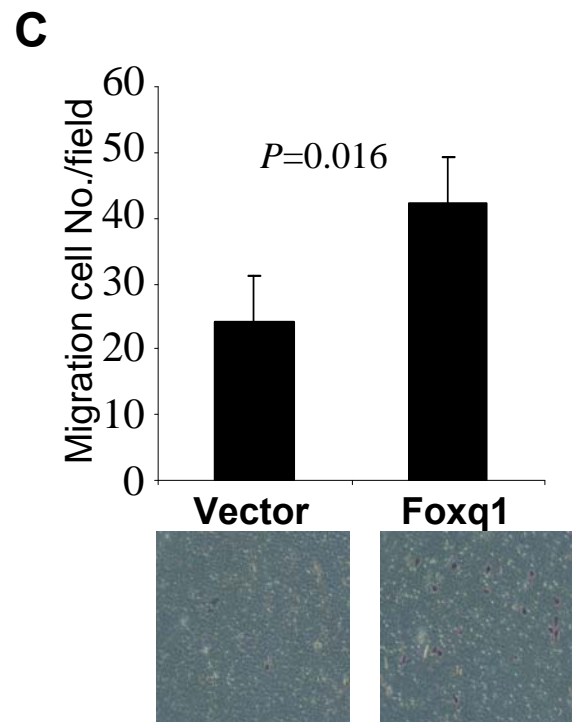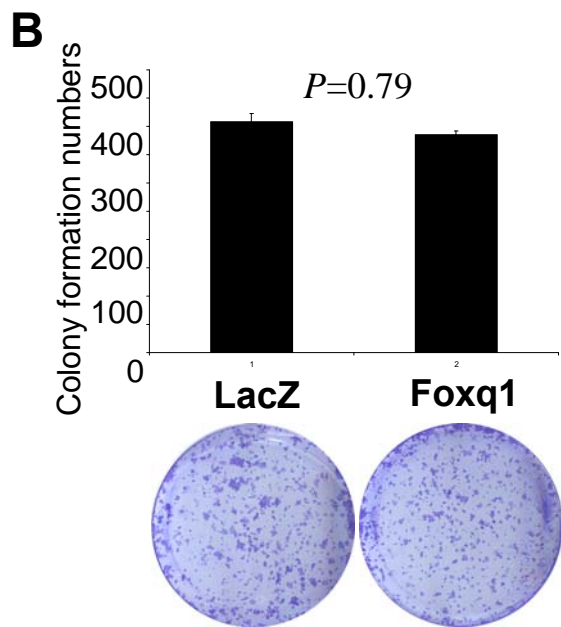

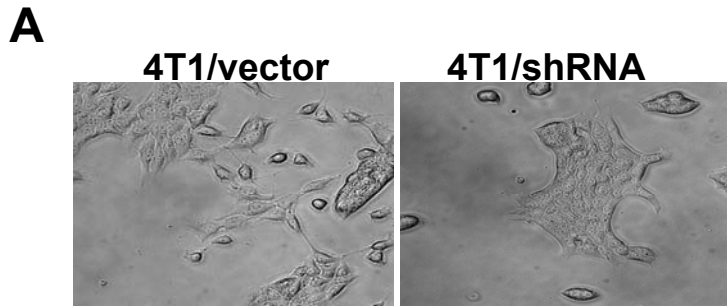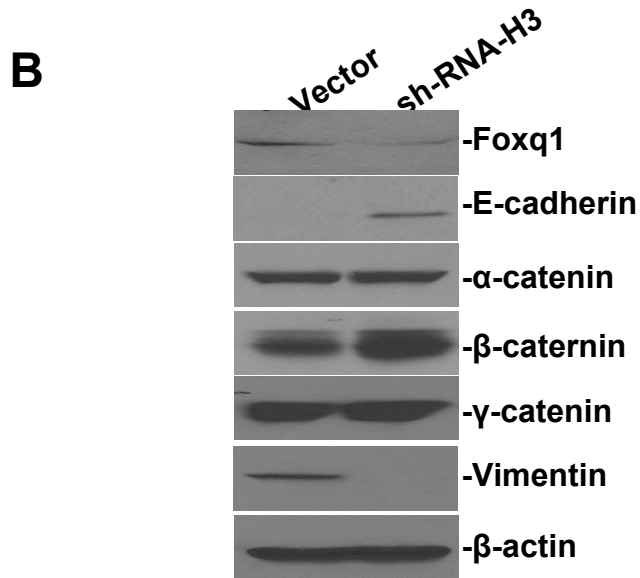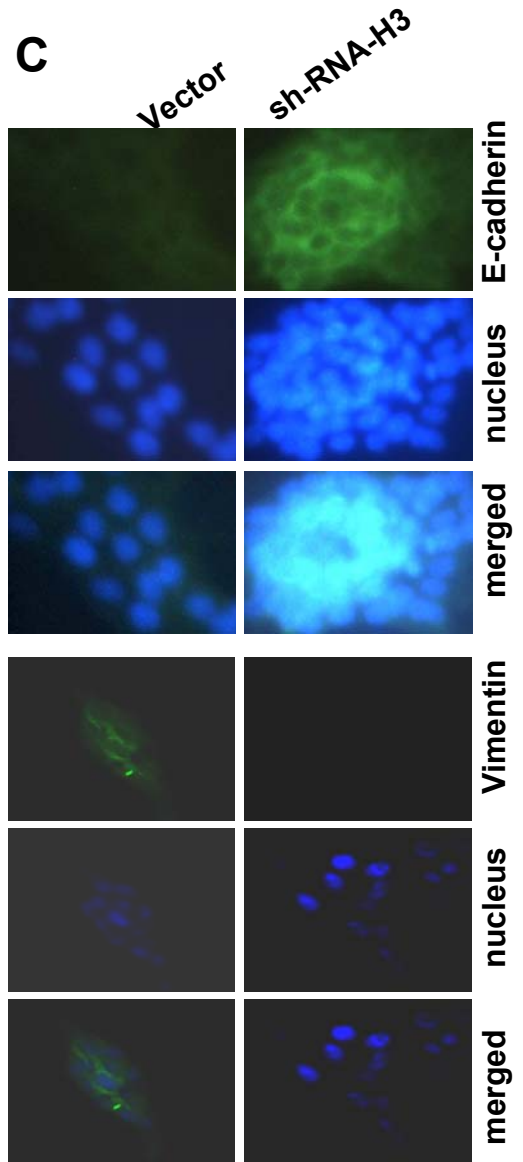

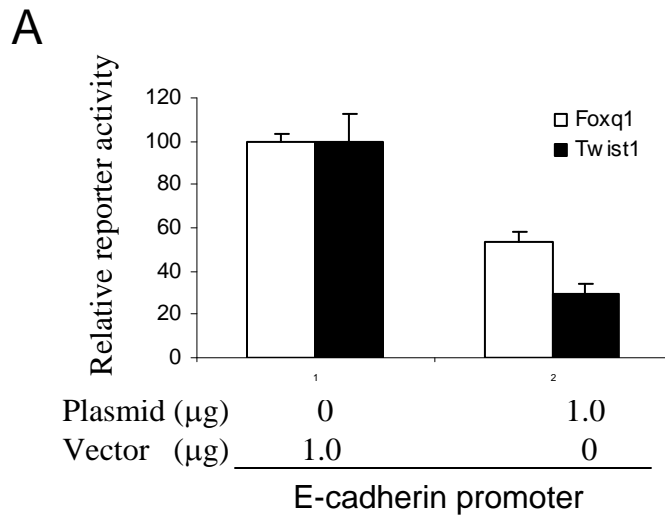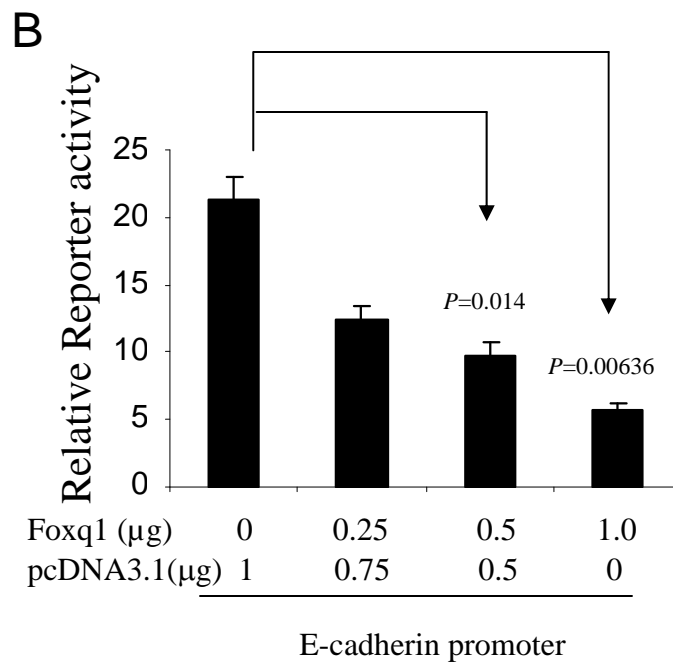

Supplementary figure 12. Zhang et al.

**A**

```
cgagggccgggtgggcegggcccgtcagctccgccctggggaggggtccgcgc  
tgctgattggctgtggccggcaggtgaaccctcagccaatcagcggtaacg  
E-box-A  
gggggcegggtgcctccggggtcacctggtcagccaacgcacccccctctc  
E-box-B  
AGTGGCGTCGGAAGTCAAAGCACCTGTGAGCTTGCGGAAGTCAGTTCAG  
Exon1 E-box-C  
ACTCCAGCCCGCTCCAGCCCGGCCCGACCCGACCCGACCCGGCGCCTGCC  
CTCGCTCGGCGTCCCCGGCCAGCCATGGGCCCTTGGAGCCGCAGCCTCTC  
GGCGCTGCTGCTGCTGCTGCAGgtacccccggatcccctgacttgcgaggg
```

**B**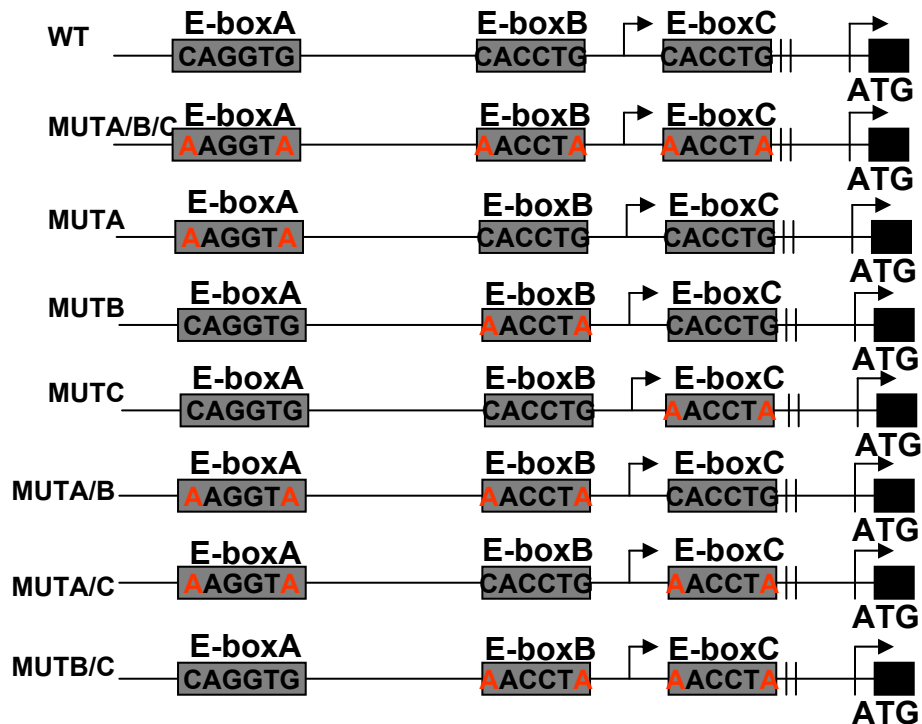

Supplementary figure 13. Zhang et al.

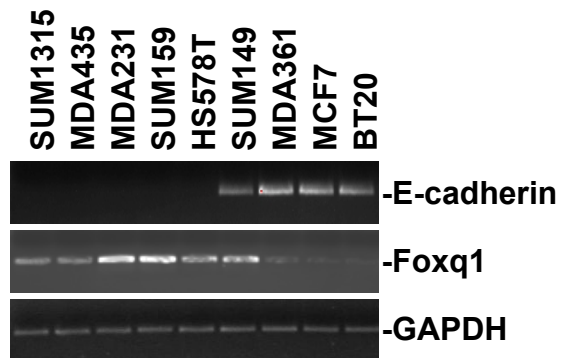

Supplementary figure 14. Zhang et al.

### **Supplementary figure legends**

#### **Figure S1. Confirmation of the microarray data with quantitative real time RT-PCR.**

The expression patterns of 18 genes in a panel of human breast cancer cell lines were investigated by quantitative real time RT PCR. SUM1315, MDA435, MDA231, SUM159, HS578T, SUM149 are highly-metastatic cell lines. MDA361, MCF7 and BT20 are poorly-metastatic cell lines. These 18 genes showed up-regulation in highly metastatic cell lines.

#### **Figure S2. Confirmation of the microarray data with quantitative real time RT-PCR.**

The expression patterns of 10 genes in a panel of human breast cancer cell lines were investigated by quantitative real time RT PCR. SUM1315, MDA435, MDA231, SUM159, HS578T, SUM149 are highly-metastatic cell lines. MDA361, MCF7 and BT20 are poorly metastatic cell lines. These 10 genes showed down-regulation in highly-metastatic cell lines.

#### **Figure S3. Confirmation of the microarray data with quantitative real time RT-PCR.**

*A*, The expression patterns of 18 genes in a panel of mouse breast cancer cell lines were investigated by quantitative real time RT PCR. These 18 genes showed up-regulation in highly-metastatic mouse cell line 4T1. *B*, The expression patterns of 10 genes in a panel of mouse breast cancer cell lines were investigated by quantitative real time RT PCR. These 10 genes showed down-regulation in highly-metastatic mouse cell line 4T1.

**Figure S4. The expression of *Foxq1* in human and mouse breast cancer cell lines and Subcellular localization of the *Foxq1* gene.** *A* and *B*, Investigation of the protein level of *Foxq1* in human (*A*) and mouse (*B*) model cell lines using western blotting.  $\beta$ -actin is used as a protein loading control. +, highly metastatic. -, poorly metastatic. Triangular bar indicates an increase of metastasis. *C*, Subcellular localization of the *Foxq1* gene. The *Foxq1* gene is V5-tagged and was transfected into 293 cells. An immunofluorescence analysis was performed with an anti-V5 antibody (green, left). HOECHST 33342 was used to stain DNA (blue, center). Merged images were present on the right.

**Figure S5. The effect of ectopic expression of *Foxq1* on cell proliferation and colony formation in HMLE cells.** *A*, MTT assay shows that overexpression of *Foxq1* in HMLE cells doesn't change the cell proliferation in seven days. *B*, Cell colony formation assay shows that ectopic expression of *Foxq1* in HMLE cells doesn't change the colony formation capability of HMLE cells ( $P=0.69$ ). *C* and *D*, ectopic expression of *Foxq1* in HMLE cells promotes migration (*C*) and invasion (*D*).

**Figure S6. The effect of ectopic expression of *Foxq1* on cell proliferation and colony formation in EpRas cells.** *A*, MTT assay shows that overexpression of *Foxq1* in EpRas cells doesn't change the cell proliferation in nine days. *B*, Cell colony formation assay shows that ectopic expression of *Foxq1* in EpRas doesn't change the colony formation capability of EpRas cells ( $P=0.13$ ). *C* and *D*, ectopic expression of *Foxq1* in EpRas cells promotes migration (*C*) and invasion (*D*).



**Figure S7. The effect of inhibition of expression of *Foxq1* on cell proliferation and colony formation in 4T1 cells.** *A*, MTT assay shows that knockdown of *Foxq1* in 4T1 cells doesn't change the cell proliferation in 168 hours (7 days). *B*, Cell colony formation assay shows that knockdown of *Foxq1* in 4T1 doesn't change the colony formation capability of 4T1 cells ( $P=0.76$ ). *C* and *D*, Knockdown of *Foxq1* expression in 4T1 cells inhibits migration (*C*) and invasion (*D*). *E*. Introduction of hFoxq1 to 4T1 cells with *Foxq1* knockdown does not change the cell proliferation. *F*. Introduction of hFoxq1 to 4T1 cells with *Foxq1* knockdown promotes cell migration (top two panels) and invasion (low two panels).

**Figure S8. The effect of *Foxq1* expression on tumor growth *in vivo*.** Comparison of the weights of primary mammary tumors formed by EpRas cells expressing either *Foxq1* or control vector. Same numbers of both cells were injected into nude mice. Each data point represents the mean  $\pm$  SEM.

**Figure S9. The effect of *Foxq1* on EMT program in MDCK cells.** *A*, Western blotting results show the effect of *Foxq1* overexpression on EMT markers in the MDCK cells. The epithelial markers E-cadherin was down-regulated and the other epithelial markers and mesenchymal marker Vimentin were not changed. *B*, Immunofluorescence assays confirmed the results of the western blot in MDCK cells. Panel showed down-regulation of E-cadherin in MDCK cells with *Foxq1* expression. Red signals stand for the stain of the E-cadherin gene. Blue signals stand for the nucleus staining.

**Figure S10. The effect of ectopic expression of *Foxq1* on cell proliferation, colony formation and migration in MDCK cells.** *A*, MTT assay shows that ectopic expression of *Foxq1* in MDCK cells doesn't change the cell proliferation in nine days. *B*, Cell colony formation assay shows that ectopic expression of *Foxq1* in MDCK cells doesn't change the colony formation capability of MDCK cells ( $P=0.79$ ). *C*, Cell migration assay using the BD transwell migration chambers shows that overexpression of *Foxq1* leads to an increase of migration ability of MDCK cells (53%,  $P=0.016$ ).

**Figure S11. The effect of *Foxq1* on EMT program in mouse mammary epithelial cell 4T1.** *A*, Representative pictures show the morphological change after inhibition of *Foxq1* expression in 4T1 cell. *B*, Western blotting results show the effect of *Foxq1* inhibition in the 4T1 cells on EMT markers. The epithelial markers E-cadherin and  $\beta$ -catenin were up-regulated and mesenchymal marker Vimentin is inhibited. ShRNA-H3 represents cell lysates of *Foxq1* shRNA-H3 cells. *C*, Immunofluorescence assays confirmed the results of the western blot in 4T1 cells (*B*). Top panels shows up-regulation of E-cadherin in 4T1 cells with knockdown of *Foxq1* expression. The low panels show Vimentin expression was down-regulated due to the knockdown of *Foxq1* expression. ShRNA-H3 represents 4T1 cells with *Foxq1* shRNA-H3.

**Figure S12. Foxq1 repress *E-cadherin* promoter.** *A*, The luciferase assay shows that the twist gene harbors stronger repressive capability on E-cadherin gene promoter than the Foxq1 gene. *B*, The Luciferase assay shows that *Foxq1* down-regulates the *E-cadherin* promoter in a dose-dependent manner in MCF7 cells. Variable amounts of the

*Foxq1* expression construct and pcDNA3.1 vector were co-transfected into MCF7 cells with the *E-cadherin* promoter plasmid. Bars, SD.

**Figure S13. The sequence and constructs of the *E-cadherin* gene promoter.** *A*, The sequence of the *E-cadherin* gene promoter. The three E- box regions, transcriptional start point and start point (ATG) are indicated as labeled. *B*, Schematic diagram of the *E-cadherin* gene promoter cloned into the pGL3 basic reporter construct. A series of mutant constructs are shown. The position of the three E-box regions relative to ATG is shown for each construct. The wild type and mutant sequences of E-box were shown in the shaded boxes.

**Figure S14. Reverse correlation of *Foxq1* and *E-cadherin*.** Reverse correlation of *Foxq1* and *E-cadherin* expression in breast cancer cell lines. RT-PCR showed the expression pattern of *Foxq1* and *E-cadherin* in a set of breast cancer cell lines. GAPDH is an RNA control.

**Table S1. twenty-two up-regulated genes**

| Gene   | 4T1      |          | MDA231   | SUM159   |
|--------|----------|----------|----------|----------|
|        | 67NR     | 168FARN  | MCF7     |          |
|        | PLAU     | 10.86717 | 4.396752 | 58.65388 |
| CTGF   | 2.299719 | 5.782955 | 49.72356 | 10.10379 |
| NT5E   | 3.816829 | 3.006329 | 32.80148 | 4.837398 |
| FOXQ1  | 3.473339 | 3.400526 | 20.53662 | 17.81016 |
| CD44   | 2.482212 | 2.542759 | 20.51093 | 11.31299 |
| CD68   | 2.284462 | 5.098053 | 14.04149 | 4.337182 |
| LAMB3  | 22.18648 | 12.19286 | 12.25399 | 5.538799 |
| TGFBR2 | 2.553168 | 2.557427 | 12.10823 | 16.33052 |
| GCNT2  | 3.690767 | 4.180192 | 8.903633 | 4.866379 |
| ITGA3  | 3.756690 | 2.343037 | 8.236642 | 5.767789 |
| CTSC   | 4.604886 | 4.925045 | 7.155259 | 7.10876  |
| COTL1  | 2.409051 | 5.254732 | 5.849719 | 5.479707 |
| EGFL9  | 3.872563 | 2.254671 | 4.102571 | 2.732542 |
| SRPR   | 2.088897 | 2.2592   | 3.743962 | 3.572755 |
| COL7A1 | 2.505199 | 2.441787 | 3.550176 | 8.232615 |
| F2R    | 2.336289 | 3.299181 | 3.028073 | 2.680544 |
| FSCN1  | 2.800273 | 3.146898 | 2.767984 | 7.555569 |
| BMP1   | 4.325937 | 5.831634 | 2.399728 | 3.691573 |
| JOSD3  | 2.46529  | 2.221018 | 2.277617 | 2.733281 |
| MAPK12 | 6.058898 | 5.185764 | 2.272213 | 3.926462 |
| MTMR2  | 3.077857 | 3.435021 | 2.172874 | 2.145049 |
| EVC    | 3.875810 | 3.764287 | 2.025917 | 2.840985 |

**Table S2. twelve down-regulated genes**

| Gene     | 67NR     | 168FARN  | MCF7     |          |
|----------|----------|----------|----------|----------|
|          |          | 4T1      | MDA231   | SUM159   |
| CXCL12   | 27.8304  | 64.65065 | 7.716821 | 6.504192 |
| CRIP2    | 17.51906 | 14.20295 | 20.92149 | 25.19247 |
| IRX5     | 12.01882 | 6.735616 | 3.061279 | 14.11685 |
| CDKN1A   | 9.333535 | 8.908734 | 2.319016 | 3.196259 |
| PHLDA3   | 6.350332 | 5.793361 | 6.439936 | 4.808639 |
| DBP      | 5.48507  | 2.847345 | 2.944285 | 3.032524 |
| PPIC     | 5.30236  | 16.38163 | 3.41355  | 3.817891 |
| HIST1H1C | 2.22425  | 3.565479 | 6.004867 | 5.954476 |
| SLC39A6  | 2.213763 | 2.727612 | 3.007224 | 2.251689 |
| TOB1     | 2.145595 | 2.462454 | 6.377567 | 5.356411 |
| CAMK2B   | 2.107861 | 2.47037  | 7.830648 | 7.128167 |
| LARGE    | 2.070512 | 3.454575 | 13.29347 | 13.00762 |

**Table S3. categories of differentially expressed genes**

| Gene                                        | Detailed description or Function                        | EMT | Metastasis |
|---------------------------------------------|---------------------------------------------------------|-----|------------|
| <i>ECM and adhesion protein</i>             |                                                         |     |            |
| PLAU                                        | UPA, plasminogen activator, urokinase                   |     | X          |
| CTSC                                        | cathepsin C                                             |     | X          |
| ITGA3                                       | integrin, alpha 3                                       |     | X          |
| COL7A1                                      | collagen, type VII, alpha1                              |     | X          |
| LAMB3                                       | laminin, beta 3                                         |     | X          |
| <i>ligand, growth factors and receptors</i> |                                                         |     |            |
| <b>CXCL12</b>                               | chemokine (C-X-C motif) ligand 12                       |     | X          |
| CTGF                                        | connective tissue growth factor                         | X   | X          |
| BMP1                                        | bone morphogenetic protein1                             |     | X          |
| TGFR2                                       | transforming growth factor, beta receptor II            | X   | X          |
| SRPR                                        | signal recognition particle receptor                    |     |            |
| F2R                                         | coagulation factor II (thrombin) receptor               |     | X          |
| <i>antigen/marker</i>                       |                                                         |     |            |
| CD44                                        | CD44 antigen                                            |     | X          |
| CD68                                        | macrophage marker                                       |     |            |
| <i>transcription factor</i>                 |                                                         |     |            |
| FOXQ1                                       | forkhead box q1                                         |     |            |
| TAF1D                                       | TATA box binding protein associated factor              |     |            |
| <b>IRX5</b>                                 | Iroquois homeobox 5                                     |     |            |
| <b>DBP</b>                                  | D-site of a albumin promoter binding protein            |     |            |
| <i>enzymes</i>                              |                                                         |     |            |
| GCNT2                                       | glucosaminyl(N-acetyl) transferase2, I branching enzyme |     |            |
| NT5E                                        | ecto-5'-nucleotidase (CD73)                             |     | X          |
| <b>PPIC</b>                                 | peptidylprolyl isomerase C (cyclophilin C)              |     |            |
| <b>LARGE</b>                                | like-glycosyltransferase                                |     |            |
| <i>kinase and phosphatase</i>               |                                                         |     |            |
| MAPK12                                      | Mitogen-activated protein kinase12 ( P38 gamma)         |     |            |
| MTMR2                                       | myotubularin related protein 2                          |     |            |
| <b>CAMK2B</b>                               | calcium/calmodulin-dependent protein kinaseII beta      |     |            |
| <b>CDKN1A</b>                               | cyclin- dependent kinase inhibitor 1A (p21)             |     |            |
| <i>cytoskeleton</i>                         |                                                         |     |            |
| COTL1                                       | coactosin-like 1(Dictyostelium)                         |     |            |
| FSCN1                                       | fascin homolog1, actin -binding protein                 |     |            |
| <i>signaling</i>                            |                                                         |     |            |
| <b>TOB1</b>                                 | transducer of ERBB2,1                                   |     |            |
| <b>PHLDA3</b>                               | pleckstrin homology-like domain, family, member3        |     |            |
| <b>CRIP2</b>                                | Cysteine-rich protein 2                                 |     |            |
| <b>LIV-1</b>                                | solute carrier family 39 (zinc transporter)             | X   | X          |
| EGFL9                                       | EGF-like-domain, multiple 9                             |     |            |
| <i>other</i>                                |                                                         |     |            |
| EVC                                         | Ellis van creveld Syndrome                              |     |            |
| <b>HIST1H1C</b>                             | histone cluster 1, Hic                                  |     |            |

\* Black genes, upregulated. Red genes, downregulated. X, reported previously.
